# Supplementary material for: Oleate Impacts on Acetoclastic and Hydrogenotrophic Methanogenesis under Mesophilic and Thermophilic Conditions
Source: MDPI journal article supplement (doi:10.3390/ijerph20043423), 2023-02-15
Supplement: s1 [file s1]

## Supplementary Materials

**Table S1** Detailed elements in phosphate buffer

| Element                              | Concentration (mg/L) | Element                                             | Concentration (mg/L) |
|--------------------------------------|----------------------|-----------------------------------------------------|----------------------|
| MgCl <sub>2</sub> ·6H <sub>2</sub> O | 400                  | CoCl <sub>2</sub> ·6H <sub>2</sub> O                | 0.17                 |
| CaCl <sub>2</sub> ·2H <sub>2</sub> O | 150                  | FeCl <sub>2</sub> ·4H <sub>2</sub> O                | 2                    |
| NH <sub>4</sub> Cl                   | 500                  | NaHCO <sub>3</sub>                                  | 5000                 |
| K <sub>2</sub> HPO <sub>4</sub>      | 872                  | ZnCl <sub>2</sub>                                   | 0.07                 |
| KH <sub>2</sub> PO <sub>4</sub>      | 680                  | H <sub>3</sub> BO <sub>3</sub>                      | 0.06                 |
| MnCl <sub>2</sub> ·4H <sub>2</sub> O | 0.611                | NiCl <sub>2</sub> ·6H <sub>2</sub> O                | 0.04                 |
| CuCl <sub>2</sub> ·2H <sub>2</sub> O | 0.027                | Na <sub>2</sub> MoO <sub>4</sub> ·2H <sub>2</sub> O | 0.025                |
| EDTA                                 | 5                    |                                                     |                      |

**Table S2** Primary bacteria composition in mesophilic and thermophilic sludge

| Temperature  | Phylum                | Genus                    | Number of OTU | Percentage (%) | Similarity (%) |
|--------------|-----------------------|--------------------------|---------------|----------------|----------------|
| Mesophilic   | <i>Thermotogae</i>    | <i>SI</i>                | 6044          | 14.14          | 100            |
|              | <i>Bacteroidetes</i>  | <i>Bacteroides</i>       | 5272          | 12.33          | 99.92          |
|              |                       | <i>Others</i>            | 8698          | 20.35          |                |
|              | <i>Firmicutes</i>     | <i>Streptococcus</i>     | 4424          | 10.35          | 97.82          |
|              |                       | <i>Syntrophomonas</i>    | 2210          | 5.17           | 97.7           |
|              |                       | <i>Others</i>            | 6512          | 15.23          |                |
|              | <i>Actinobacteria</i> | <i>Actinomyces</i>       | 4247          | 9.93           | 98.02          |
|              | <i>Chloroflexi</i>    | <i>T78</i>               | 3733          | 8.73           | 100            |
|              | <i>Synergistetes</i>  | <i>vadinCA02</i>         | 895           | 2.09           | 96.15          |
|              |                       | <i>HA73</i>              | 716           | 1.67           | 98.47          |
|              | Total                 |                          | 42751         | 100.00         |                |
| Thermophilic | <i>Thermotogae</i>    | <i>SI</i>                | 26573         | 59.04          | 100            |
|              | <i>Bacteroidetes</i>  | <i>Others</i>            | 5591          | 12.42          |                |
|              |                       | <i>Coprothermobacter</i> | 2667          | 5.93           | 100            |
|              | <i>Firmicutes</i>     | <i>Thermacetogenium</i>  | 1365          | 3.03           | 97.96          |
|              |                       | <i>Sporanaerobacter</i>  | 663           | 1.47           | 99.47          |
|              |                       | <i>Others</i>            | 5076          | 11.28          |                |
|              | <i>Synergistetes</i>  | <i>Anaerobaculum</i>     | 2095          | 4.66           | 99.82          |
|              | <i>OP9</i>            | <i>Others</i>            | 975           | 2.17           | 99.79          |
|              | Total                 |                          | 45005         | 100.00         |                |
